# Supplementary material
Source: publisher figshare collection journal article supplement (https://gsajournals.figshare.com/articles/dataset/_/9247832)

### Scenario 1

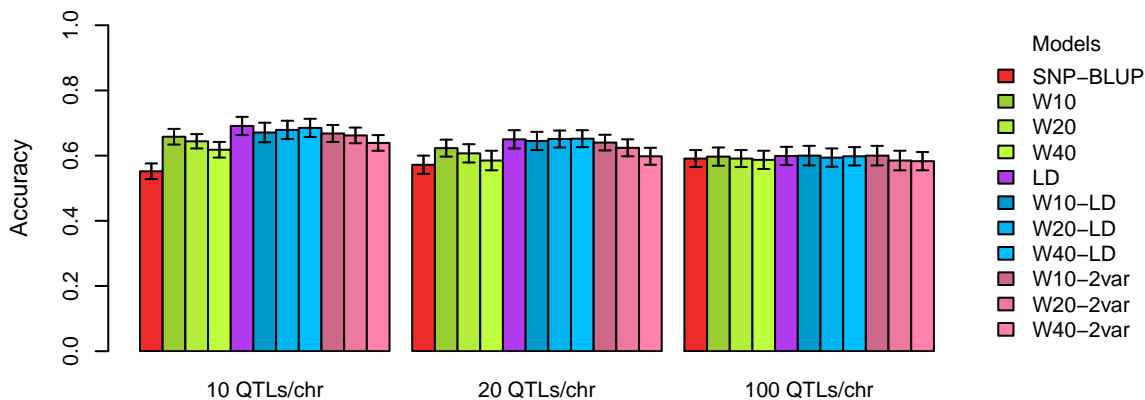

### Scenario 2

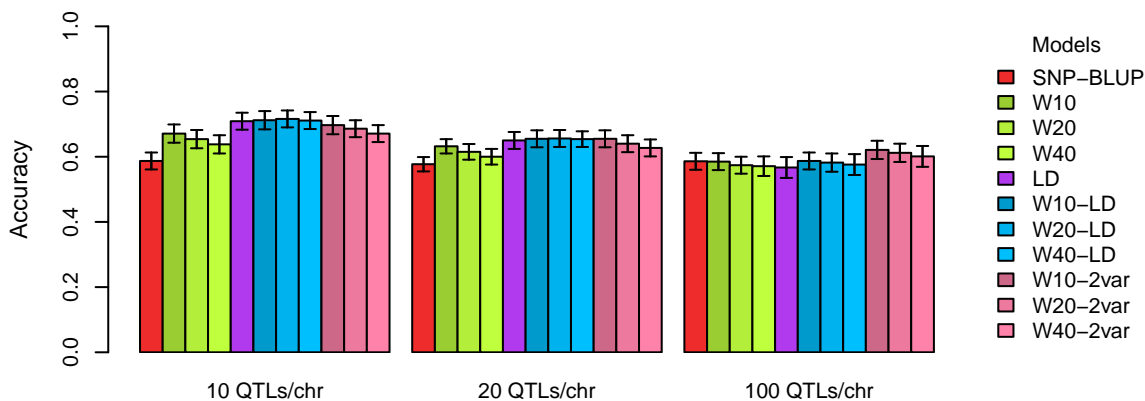

### Scenario 3

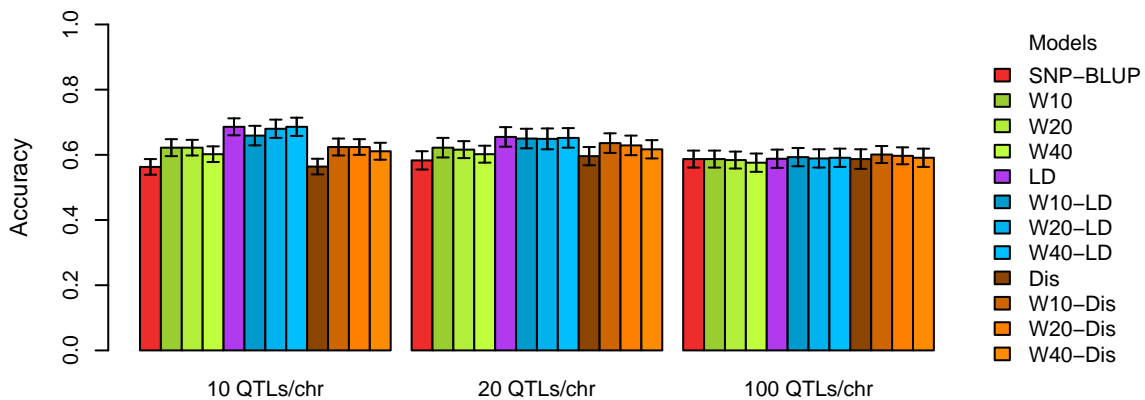

Supplement: Supplementary file 1 [file 1]

W10

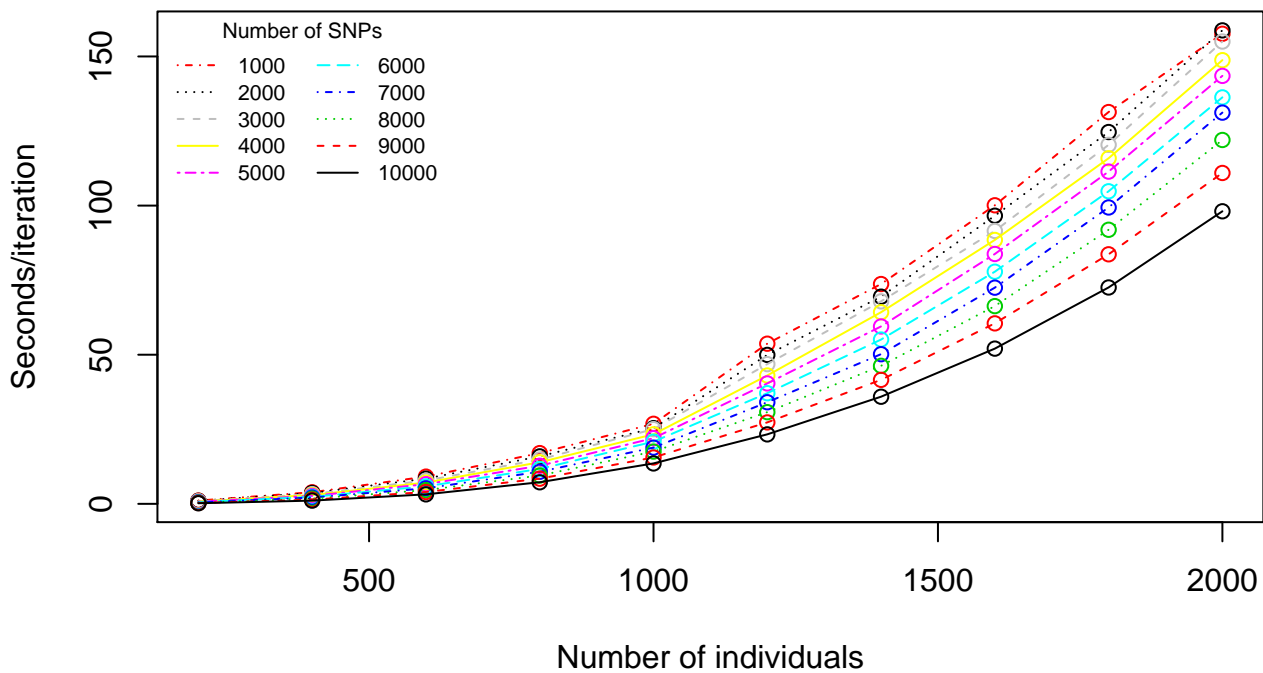

W10

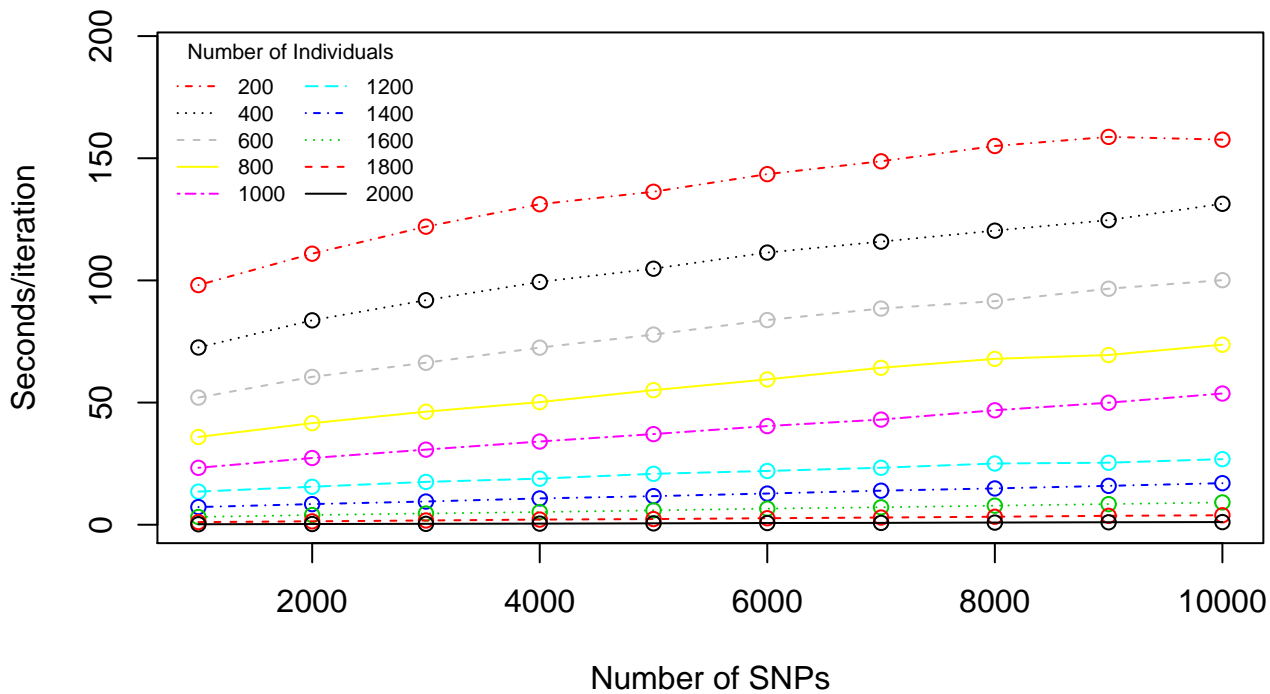

Supplement: Supplementary file 2 [file 1]
